# Supplementary material for: MP CBM-Z V1.0: design for a new CBM-Z gas-phase chemical mechanism architecture for next generation processors
Source: Copernicus journal article supplement (doi:10.5194/gmd-2018-42), 2018-04-24
Supplement: Supplementary file 1 [file gmd-2018-42-supplement.pdf]

Supplement:

Table S1. Initial concentrations used in the one-point test case.

| Species                        | Initial Value(ppb) | Species                                            | Initial Value(ppb) |
|--------------------------------|--------------------|----------------------------------------------------|--------------------|
| H <sub>2</sub> SO <sub>4</sub> | 0.5                | TOL                                                | 6.7                |
| HNO <sub>3</sub>               | 3.4                | XYL                                                | 2.8                |
| HCL                            | 9.8E-21            | CRES                                               | 6.7E-02            |
| NH <sub>3</sub>                | 2.1                | TO <sub>2</sub>                                    | 1.8E-03            |
| NO                             | 1.5                | CRO                                                | 8.9E-06            |
| NO <sub>2</sub>                | 19.0               | OPEN                                               | 0.8                |
| NO <sub>3</sub>                | 1.4E-03            | ONIT                                               | 11.7               |
| N <sub>2</sub> O <sub>5</sub>  | 8.7E-03            | ROOH                                               | 0.4                |
| HONO                           | 0.2                | RO <sub>2</sub>                                    | 7.0E-04            |
| HNO <sub>4</sub>               | 0.1                | ANO2                                               | 1.4E-04            |
| O <sub>3</sub>                 | 89.4               | NAP                                                | 1.7E-03            |
| O( <sup>1</sup> D)             | 1.3E-12            | XO <sub>2</sub>                                    | 1.2E-02            |
| O( <sup>3</sup> P)             | 1.6E-06            | XPAR                                               | 5.1E-04            |
| OH                             | 3.4E-04            | ISOP                                               | 9.0E-02            |
| HO <sub>2</sub>                | 3.2E-02            | ISOPRD                                             | 0.6                |
| H <sub>2</sub> O <sub>2</sub>  | 4.9                | ISOPP                                              | 4.8E-04            |
| CO                             | 1930.3             | ISOPN                                              | 1.3E-05            |
| SO <sub>2</sub>                | 0.9                | ISOPO <sub>2</sub>                                 | 4.9E-04            |
| CH <sub>4</sub>                | 1761.4             | DMS                                                | 9.8E-21            |
| C <sub>2</sub> H <sub>6</sub>  | 1.6E-02            | MSA                                                | 9.8E-21            |
| CH <sub>3</sub> O <sub>2</sub> | 4.0E-03            | DMSO                                               | 9.8E-21            |
| ETHP                           | 5.5E-05            | DMSO <sub>2</sub>                                  | 9.8E-21            |
| HCHO                           | 11.0               | CH <sub>3</sub> SO <sub>2</sub> H                  | 9.8E-21            |
| CH <sub>3</sub> OH             | 1.0                | CH <sub>3</sub> SCH <sub>2</sub> OO                | 9.8E-21            |
| ANOL                           | 1.5E-21            | CH <sub>3</sub> SO <sub>2</sub>                    | 9.8E-21            |
| CH <sub>3</sub> OOH            | 0.5                | CH <sub>3</sub> SO <sub>3</sub>                    | 9.8E-21            |
| ETHOOH                         | 5.8E-02            | CH <sub>3</sub> SO <sub>2</sub> OO                 | 9.8E-21            |
| ALD2                           | 5.1                | CH <sub>3</sub> SO <sub>2</sub> CH <sub>2</sub> OO | 9.8E-21            |
| HCOOH                          | 4.7                | SULFHOX                                            | 9.8E-21            |
| RCOOH                          | 4.3                | TERP                                               | 9.8E-21            |
| C <sub>2</sub> O <sub>3</sub>  | 1.5E-03            | SOA1                                               | 9.8E-21            |
| PAN                            | 5.9                | SOA2                                               | 9.8E-21            |
| PAR                            | 12.3               | SOA3                                               | 9.8E-21            |
| AONE                           | 9.7                | SOA4                                               | 9.8E-21            |
| MGLY                           | 1.0                | SOA5                                               | 9.8E-21            |
| ETH                            | 2.9                | SOA6                                               | 9.8E-21            |
| OLET                           | 3.6                | ASO <sub>4</sub>                                   | 9.8E-21            |
| OLEI                           | 6.5E-02            | ANO <sub>3</sub>                                   | 9.8E-21            |

Pressure = 1.0 atm; Relative humidity = 58%; Temperature = 304K.
